# Supplementary material
Source: Springer Nature journal article supplement (https://www.springermedizin.de/resource/supplementary/12882_2011_362_MOESM10_ESM.pdf/9453656)
Supplement: MOESM10 [file 9453656]

| <b>TAG count in ROP-Os</b> | <b>TAG count in C57-Os</b> | <b>Genes concordantly regulated between mouse model and human Glomerulus</b> | <b>log Fold Change</b> | <b>q value</b> | <b>Genes concordantly regulated between mouse model and human tubuloninterstitium</b> | <b>log Fold Change</b> | <b>q value</b> |
|----------------------------|----------------------------|------------------------------------------------------------------------------|------------------------|----------------|---------------------------------------------------------------------------------------|------------------------|----------------|
| 0                          | 7                          | Slc22a6                                                                      | -0.42                  | 0              | Slc22a6                                                                               | -0.22                  | 0              |
| 0                          | 9                          | Slc4a4                                                                       | -0.32                  | 0              |                                                                                       |                        |                |
| 1.35                       | 13                         | Aqp1                                                                         | -0.30                  | 0              |                                                                                       |                        |                |
| 5.4                        | 0                          | Psmb5                                                                        | 0.21                   | 0              |                                                                                       |                        |                |
| 5.4                        | 0                          | Pcbp1                                                                        | 0.24                   | 0              |                                                                                       |                        |                |
| 5.4                        | 0                          | Psma3                                                                        | 0.31                   | 0              |                                                                                       |                        |                |
| 6.75                       | 20                         | Pdzk1ip1                                                                     | -0.15                  | 0.02           |                                                                                       |                        |                |
| 74.25                      | 45                         | Igfbp7                                                                       | 0.14                   | 0.02           |                                                                                       |                        |                |
| 12.15                      | 3                          | Mdh2                                                                         | 0.16                   | 0.02           |                                                                                       |                        |                |
| 9.45                       | 0                          | Vamp8                                                                        | 0.11                   | 0.03           |                                                                                       |                        |                |
| 8.1                        | 1                          | Tmbim4                                                                       | 0.12                   | 0.03           |                                                                                       |                        |                |
| 5.4                        | 0                          | Ndufb11                                                                      | 0.21                   | 0.03           |                                                                                       |                        |                |
| 4.05                       | 16                         | Lifr                                                                         | -0.09                  | 0.05           | Lifr                                                                                  | -0.27                  | 0.00           |
| 12.15                      | 3                          | Sod1                                                                         | 0.06                   | 0.09           |                                                                                       |                        |                |
| 16.2                       | 6                          | Herpud1                                                                      | -0.07                  | 0.14           |                                                                                       |                        |                |
| 2.7                        | 13                         | Atp6v1a                                                                      | -0.03                  | 0.15           |                                                                                       |                        |                |
| 8.1                        | 42                         | Nrp2b                                                                        | -0.03                  | 0.15           |                                                                                       |                        |                |
| 2.7                        | 12                         |                                                                              | 0.11                   | 0.11           | ld2                                                                                   | -0.40                  | 0.00           |

Table 5. Concordantly regulated SAGE transcripts from the ROP-Os/+ mouse model (as compared to C57-Os) and transcripts derived from microarray of human kidney biopsies from patients with FSGS (as compared to normal controls).
